# Supplementary material for: Two novel supramolecular metallogels constructed by platinum(ii) coordination and pillar[5]arene-based host–guest interactions
Source: Royal Society of Chemistry journal article supplement (doi:10.1039/c7py00280g), 2017-01-01
Supplement: c7py00280g1.pdf [file c7py00280g1.pdf]

## Two novel supramolecular metallogels constructed by platinum(II) coordination and pillar[5]arene-based host–guest interactions

Zhengtao Li, Hao Xing, and Bingbing Shi\*

*Department of Chemistry, Zhejiang University, Hangzhou 310027, P. R. China,*

*Fax and Tel: +86-571-8795-3189; Email address: bingbingshi@zju.edu.cn*

### Electronic Supplementary Information

|                                                                                                                |     |
|----------------------------------------------------------------------------------------------------------------|-----|
| 1. <i>Materials and methods</i>                                                                                | S2  |
| 2. <i>Synthetic route to compound 1</i>                                                                        | S3  |
| 3. <i><math>^{31}\text{P}\{^1\text{H}\}</math> NMR spectra of 3 and assemblies</i>                             | S7  |
| 4. <i><math>^1\text{H}</math> NMR spectra of 1, 2, and 1 + 2</i>                                               | S7  |
| 5. <i><math>^1\text{H}</math> and <math>^{31}\text{P}\{^1\text{H}\}</math> NMR spectra of 4 and assemblies</i> | S8  |
| 6. <i>Partial DOSY NMR spectra of supramolecular assemblies</i>                                                | S9  |
| 7. <i>DOSY and DLS results of 1, 1 + 4, and 1 + 4 + 2</i>                                                      | S11 |
| 8. <i>SEM images of 1 + 4 and 1 + 4 + 2</i>                                                                    | S12 |
| 9. <i>Multi-responsiveness of metallogels</i>                                                                  | S12 |
| 10. <i>X-ray analysis data for 1</i>                                                                           | S13 |
| 11. <i>References</i>                                                                                          | S14 |

### *1. Materials and methods*

All reagents were commercially available and used as supplied without further purification. Compounds **2**,<sup>S1</sup> **3**,<sup>S2</sup> **4**,<sup>S3</sup> and **6**<sup>S4</sup> were synthesized by published literature procedures. NMR spectra were recorded with a Bruker Avance DMX 500 spectrophotometer with use of the deuterated solvent as the lock and the residual solvent or TMS as the internal reference. Low-resolution electrospray ionization (LRESI) mass spectra were obtained on a Bruker Esquire 3000 plus mass spectrometer (Bruker-Franzen Analytik GmbH Bremen, Germany) equipped with an ESI interface and an ion trap analyzer. High-resolution electrospray ionization mass spectra (HRESI-MS) were obtained on a Bruker 7-Tesla FT-ICR mass spectrometer equipped with an electrospray source (Billerica, MA, USA). MALDI-TOF MS was performed with a Bruker UltrafleXtreme instrument. Dynamic light scattering (DLS) was carried out on a Malvern Nanosizer S instrument at room temperature. Scanning electron microscopy (SEM) investigations were carried out on a JEOL 6390LV instrument. Rheological behaviors of gels were analyzed by using an ARG-2 rheometer (TA Instruments, USA). The disc-shaped gels with thickness of 1 mm and diameter of 20 mm were adhere to the plates and surrounded by silicone oil. Frequency sweeps were performed to the samples with strain amplitude of 0.05%.

## 2. Synthetic route to compound **1**

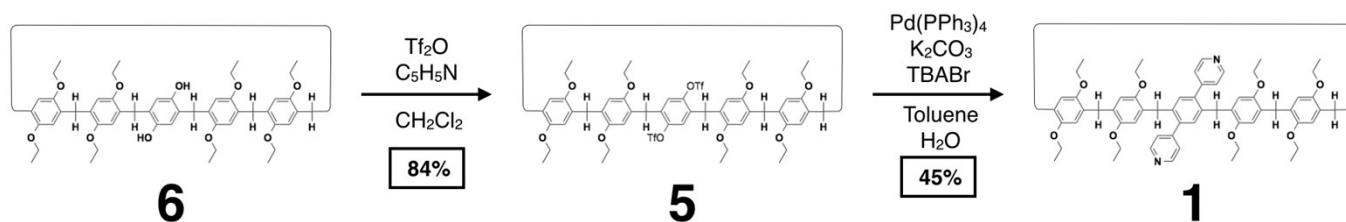

**Figure S1.** Synthetic route to compound **1**.

Trifluoromethanesulfonic anhydride (2 mL) was added dropwise to a mixture of **6** (500 mg, 0.69 mmol) and C<sub>5</sub>H<sub>5</sub>N (dry, 1 mL) in CH<sub>2</sub>Cl<sub>2</sub> (dry, 20 mL), cooled to 0 °C and then allowed to stir at room temperature for 12 h. The reaction mixture was concentrated under vacuum and subjected to silica gel chromatography (1:1 hexane/CH<sub>2</sub>Cl<sub>2</sub>) to give **5** as a white powder (520 mg, 84%). The <sup>1</sup>H NMR spectrum of **5** is shown in Figure S2. <sup>1</sup>H NMR (500 MHz, CDCl<sub>3</sub>, 298 K) δ = 7.38 (1H, s), 6.79 (1H, s), 6.76 (1H, s), 6.75 (1H, s), 6.67 (1H, s), 3.95–3.79 (14H, m), 1.42–1.22 (12 H, m). The <sup>13</sup>C NMR spectrum of **5** is shown in Figure S3. <sup>13</sup>C NMR (125 MHz, CDCl<sub>3</sub>, 298 K) δ = 148.88, 148.77, 148.75, 148.54, 145.05, 133.11, 128.96, 127.77, 127.02, 123.77, 123.19, 119.13, 115.95, 113.96, 113.66, 113.16, 62.81, 62.77, 62.36, 52.22, 29.64, 28.59, 28.12, 14.12, 14.04, 13.53. LRESIMS is shown in Figure S4: *m/z* 1116.4 [M + NH<sub>4</sub><sup>+</sup>]<sup>+</sup>. HRESIMS: *m/z* calcd for [M + H]<sup>+</sup> C<sub>53</sub>H<sub>61</sub>O<sub>14</sub>F<sub>6</sub>S<sub>2</sub><sup>+</sup>, 1099.34069; found 1099.34181; error 1 ppm.

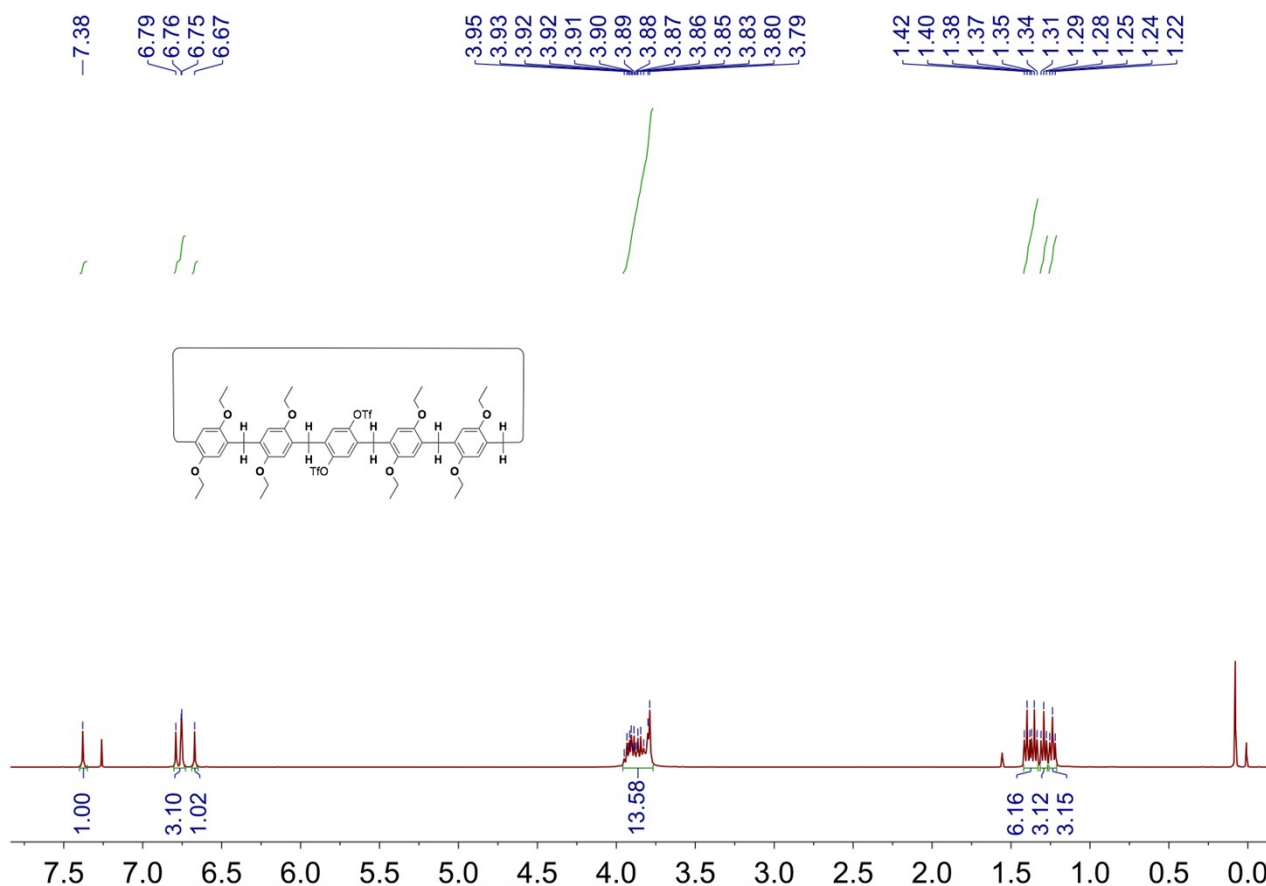

**Figure S2.** <sup>1</sup>H NMR spectrum (500 MHz, CDCl<sub>3</sub>, 298 K) of **5**.

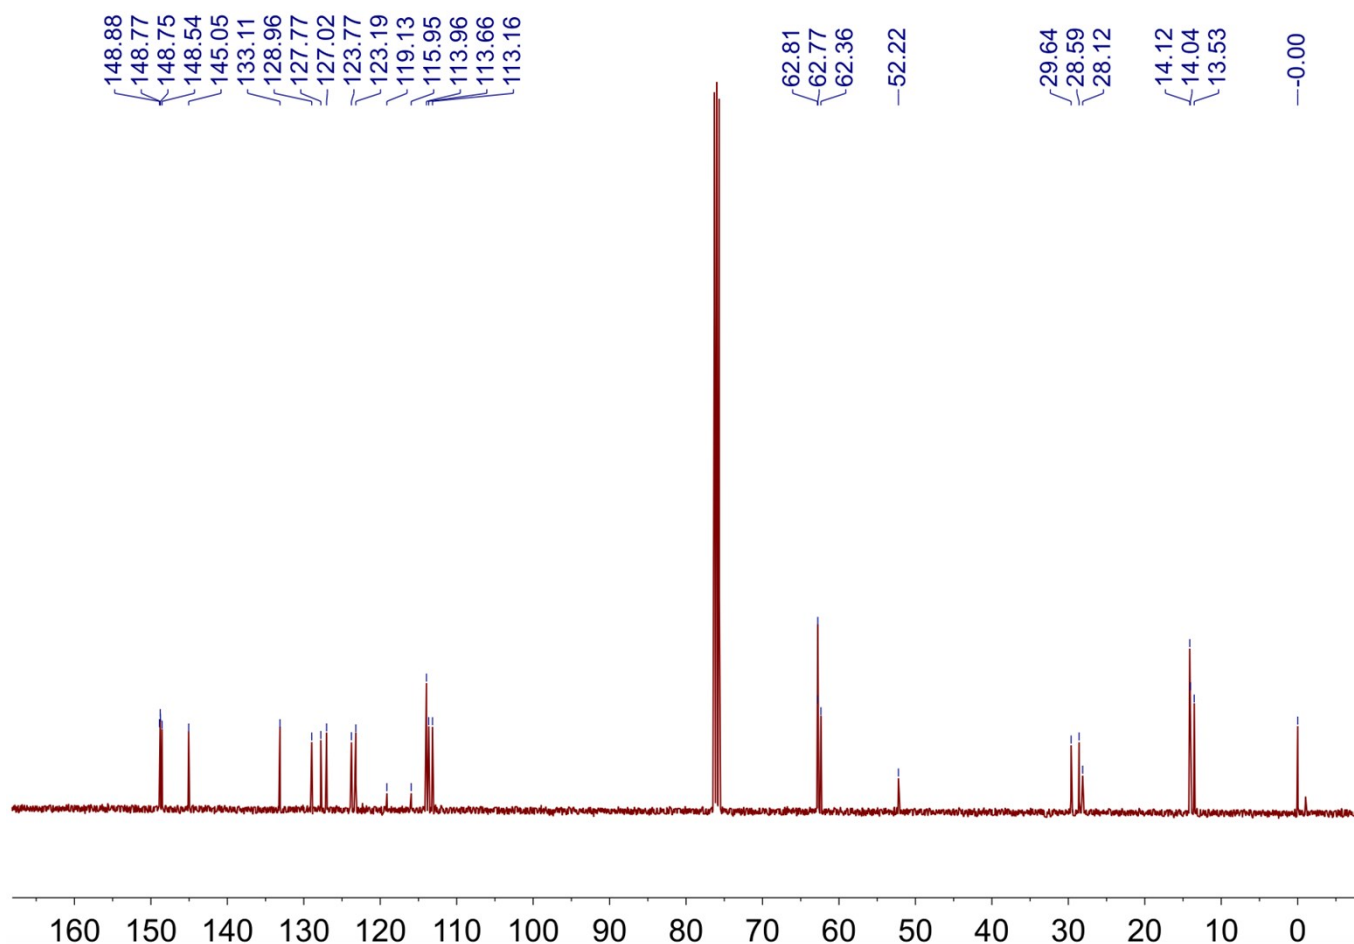

**Figure S3.**  $^{13}\text{C}$  NMR spectrum (125 MHz,  $\text{CDCl}_3$ , 298 K) of **5**.

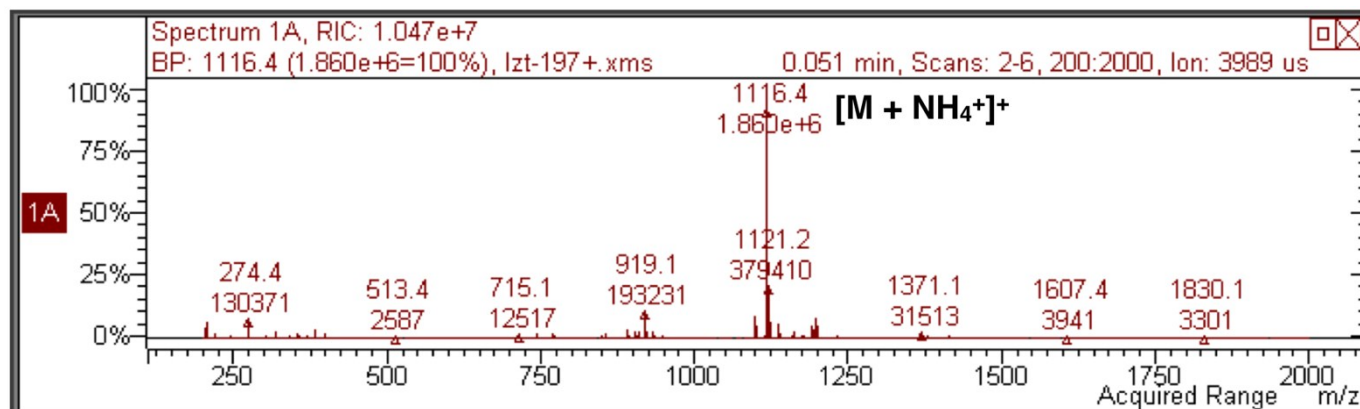

**Figure S4.** LRESIMS spectrum of **5**.

$\text{Pd}(\text{PPh}_3)_4$  (266 mg, 0.230 mmol) was added to a mixture of **5** (1.04 g, 1.01 mmol), 4-pyridinyl boronic acid (738 mg, 6.00 mmol), and  $\text{K}_2\text{CO}_3$  (2.49 g, 1.80 mmol) in 80.0 mL of a mix solvent (Toluene/ $\text{H}_2\text{O}$ , 3:1 v/v). The mixture was stirred at 100 °C for 24 h. After cooling to room temperature, the excess solvent was removed on a rotary evaporator at reduced pressure. After adding 200 mL of  $\text{CH}_2\text{Cl}_2$ , the solution was washed with  $\text{H}_2\text{O}$  (2  $\times$  100 mL), brine (100 mL), and dried ( $\text{Na}_2\text{SO}_4$ ) then concentrated under vacuum, and finally subjected to silica gel chromatography ( $\text{CH}_2\text{Cl}_2/\text{MeOH}$ , 100:1 v/v) to give **1** (0.37 g,

45%). The  $^1\text{H}$  NMR spectrum of **5** is shown in Figure S5.  $^1\text{H}$  NMR (500 MHz,  $\text{CDCl}_3$ , 298 K)  $\delta$  = 8.45 (4H, s), 6.89 (6H, s), 6.86 (2H, s), 6.74 (2H, s), 6.53 (2H, s), 5.95 (2H, s), 3.95–3.56 (26H, m), 1.46–1.43 (6H, t,  $J$  = 7.5 Hz), 1.26–1.24 (6H, t,  $J$  = 5.0 Hz), 1.17–1.15 (6H, t,  $J$  = 5.0 Hz), 0.97–0.94 (6H, t,  $J$  = 7.5 Hz). The  $^{13}\text{C}$  NMR spectrum of **1** is shown in Figure S6.  $^{13}\text{C}$  NMR (125 MHz,  $\text{CDCl}_3$ , 298 K)  $\delta$  = 150.02, 149.99, 149.69, 149.52, 149.28, 138.59, 136.91, 131.45, 129.83, 128.98, 128.64, 126.81, 124.24, 115.22, 115.16, 114.97, 114.58, 64.12, 64.05, 63.23, 33.10, 30.96, 29.95, 29.61, 15.34, 15.19, 14.86, 14.56. MOLDI-TOF is shown in Figure S7:  $m/z$  957.120  $[\text{M} + \text{H}]^+$ .

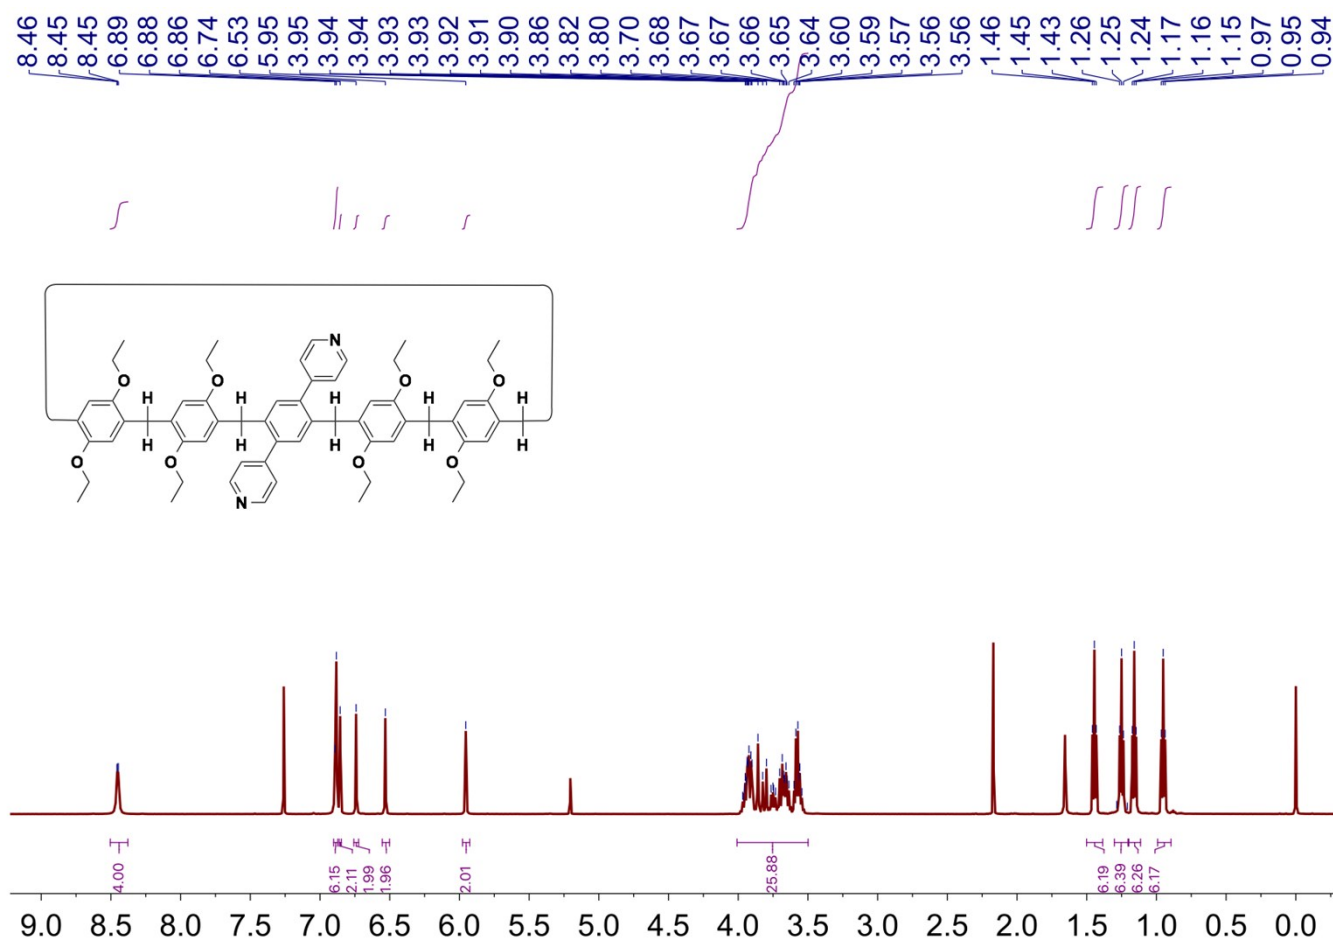

**Figure S5.**  $^1\text{H}$  NMR spectrum (500 MHz,  $\text{CDCl}_3$ , 298 K) of **1**.

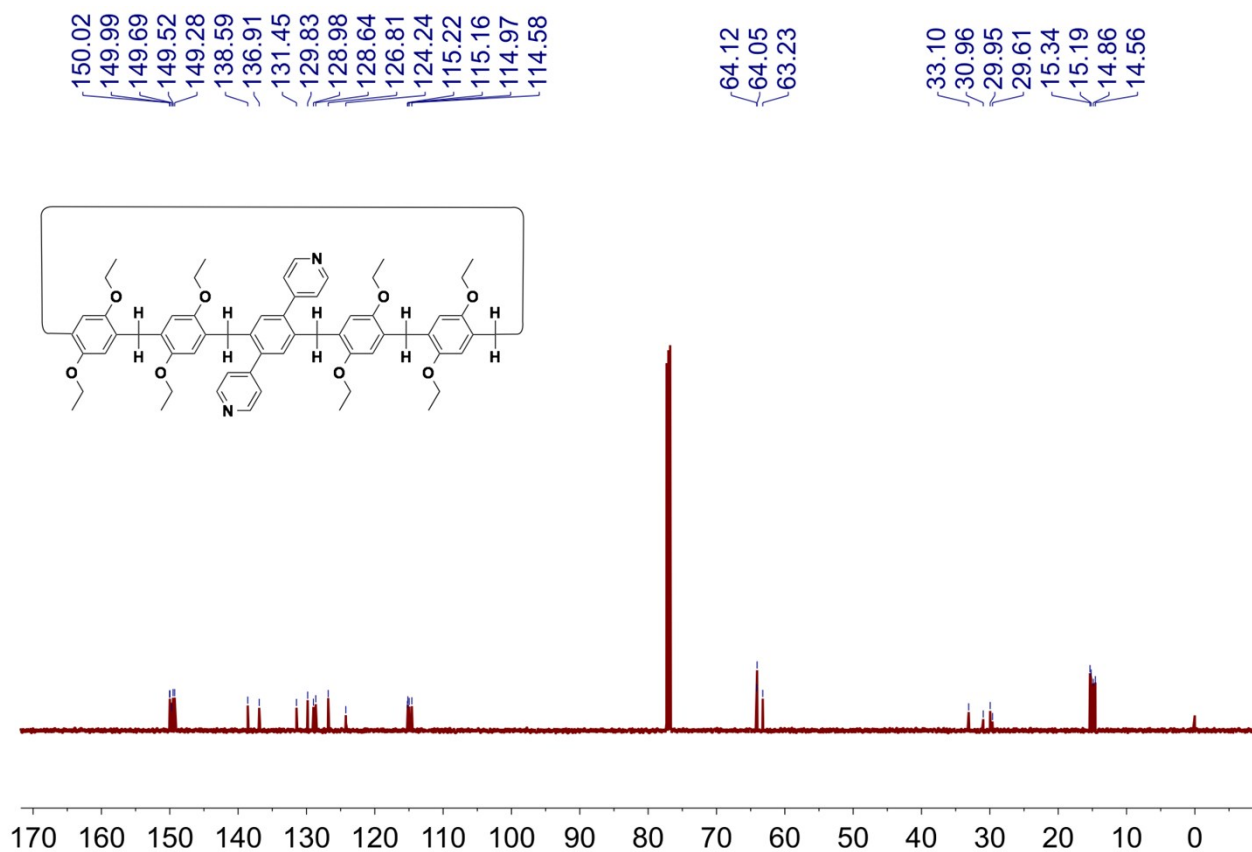

**Figure S6.**  $^{13}\text{C}$  NMR spectrum (125 MHz,  $\text{CDCl}_3$ , 298 K) of **1**.

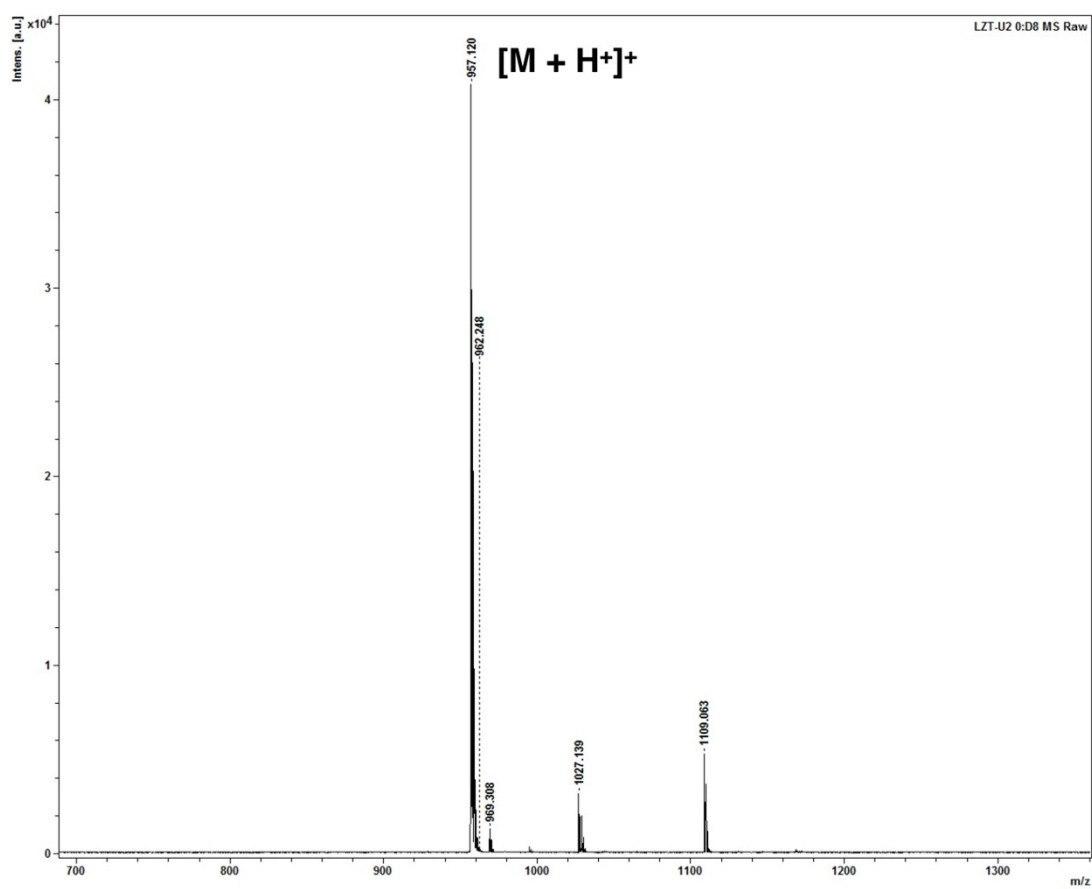

**Figure S7.** MOLDI-TOF spectrum of **1**.

3.  $^{31}\text{P}\{^1\text{H}\}$  NMR spectra of **3** and assemblies

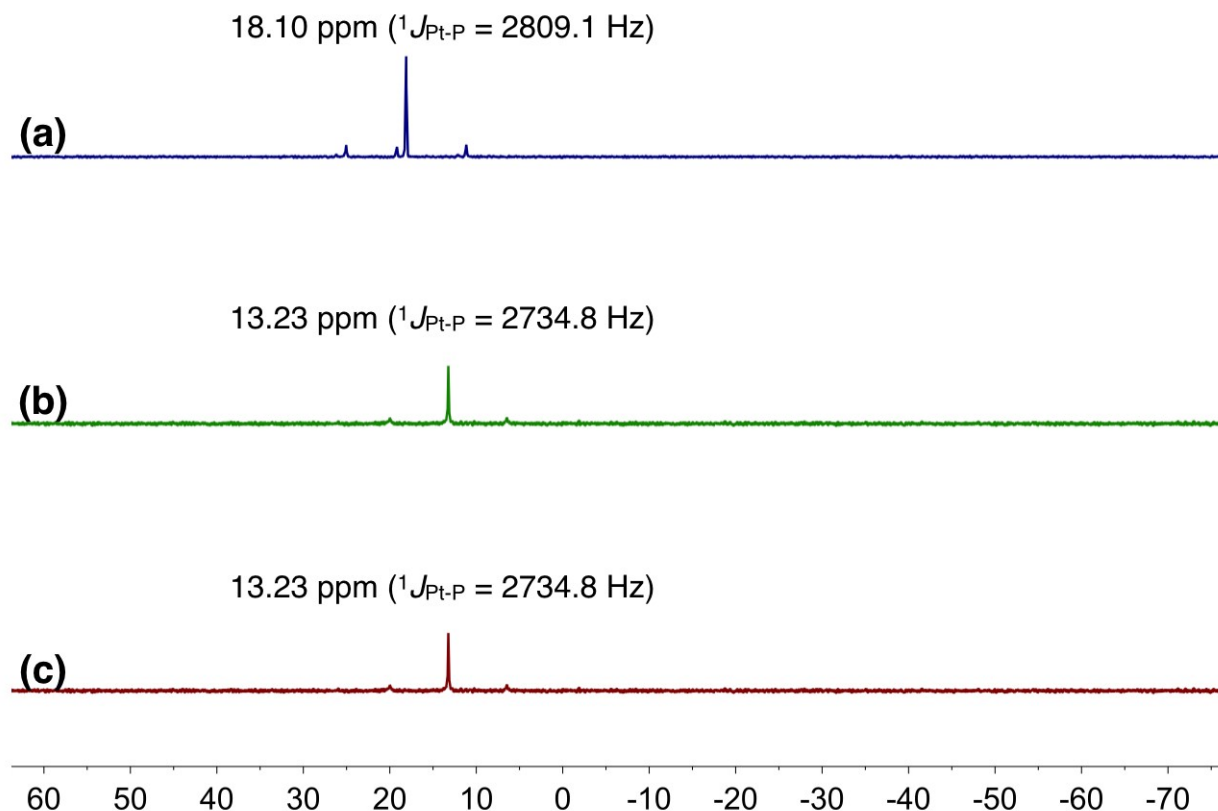

**Figure S8.** Partial  $^{31}\text{P}\{^1\text{H}\}$  NMR spectra (202.3 MHz, acetone- $d_6$ , 298 K): (a) **3**; (b) **1** + **3**; (c) **1** + **3** + **2**.  $c = 5.00$  mM.

4.  $^1\text{H}$  NMR spectra of **1**, **2**, and **1** + **2**

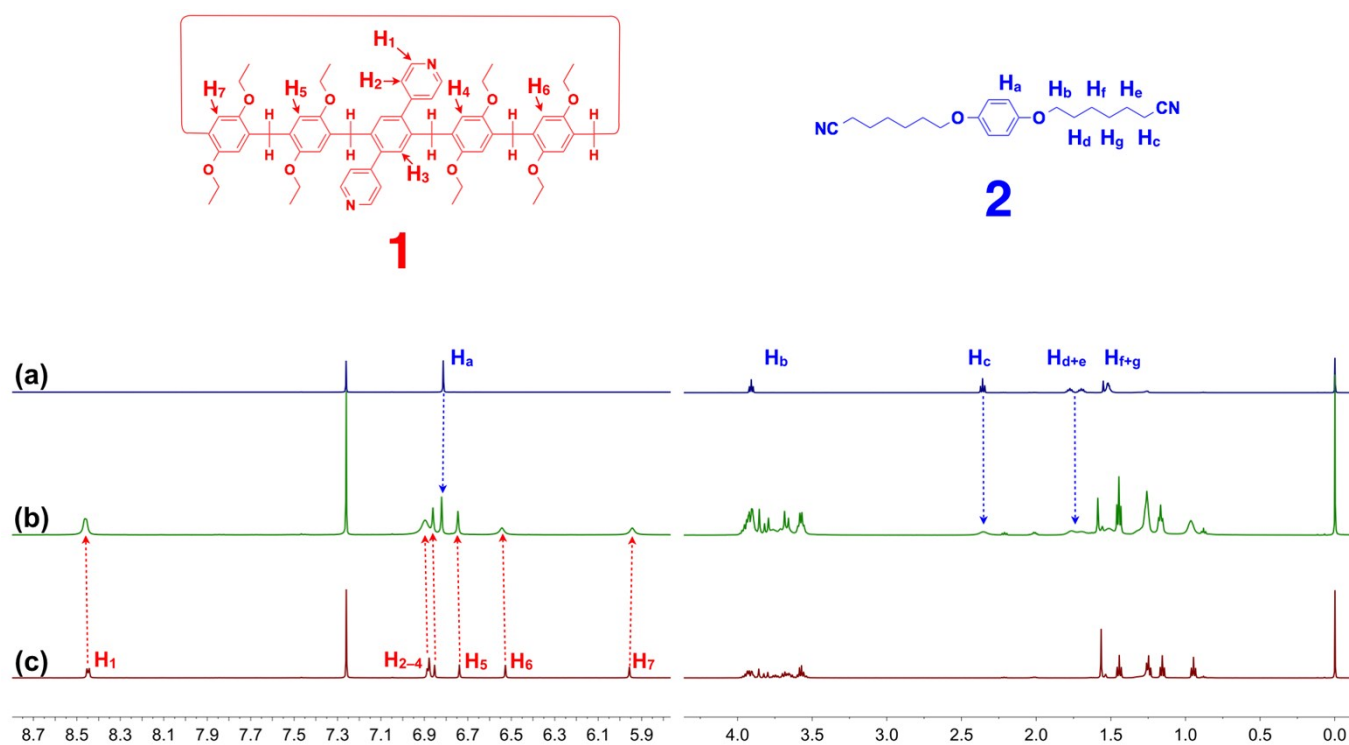

**Figure S9.** Partial  $^1\text{H}$  NMR spectra (500 MHz,  $\text{CDCl}_3$ , 298 K): (a) **2**; (b) **1** + **2**; (c) **1**.  $c = 5.00$  mM.

5.  $^1\text{H}$  and  $^{31}\text{P}\{^1\text{H}\}$  NMR spectra of **4** and assemblies

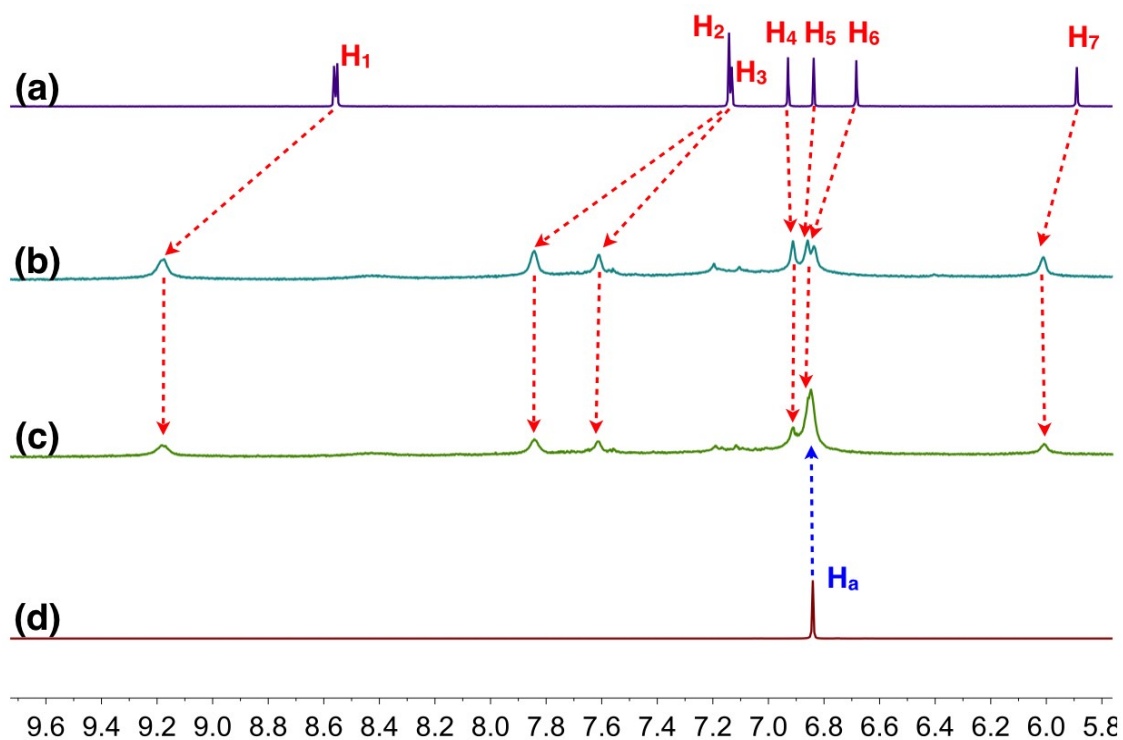

**Figure S10.** Partial  $^1\text{H}$  NMR spectra (500 MHz, acetone- $d_6$ , 298 K): (a) **1**; (b) **1 + 4**; (c) **1 + 4 + 2**; (d) **2**.  $c = 5.00$  mM.

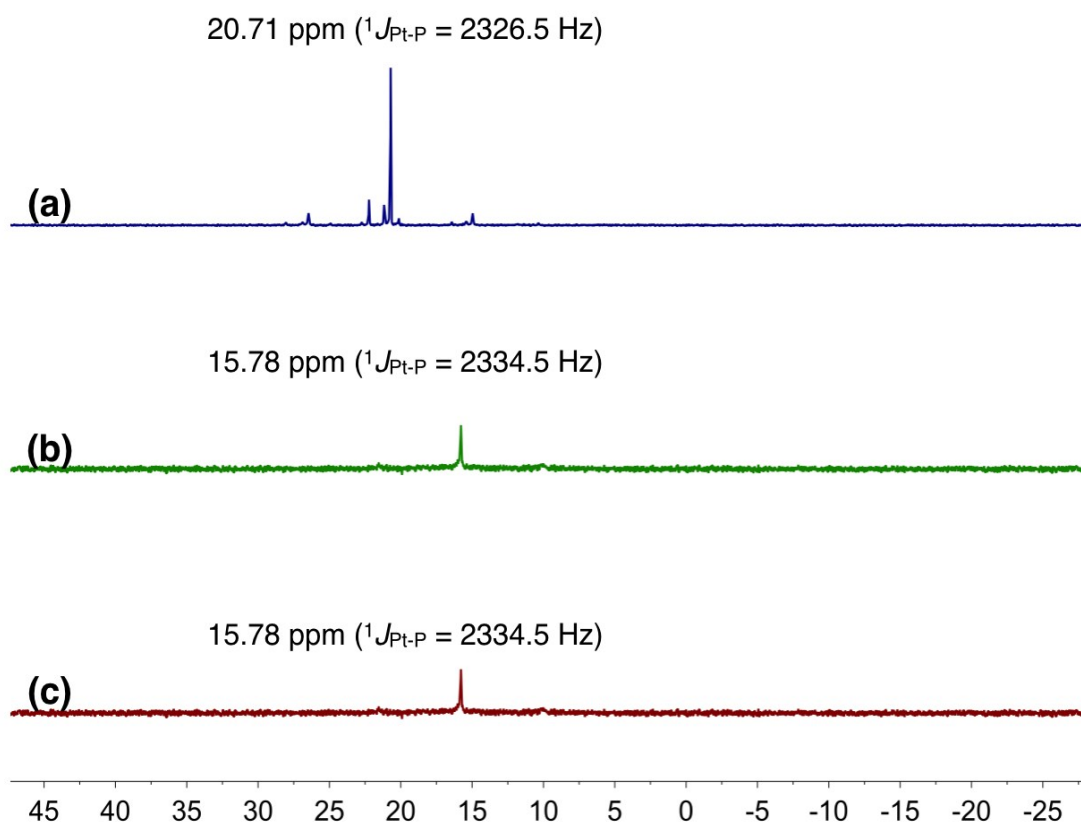

**Figure S11.** Partial  $^{31}\text{P}\{^1\text{H}\}$  NMR spectra (202.3 MHz, acetone- $d_6$ , 298 K): (a) **4**; (b) **1 + 4**; (c) **1 + 4 + 2**.  $c = 5.00$  mM.



6. Partial DOSY NMR spectra of supramolecular assemblies

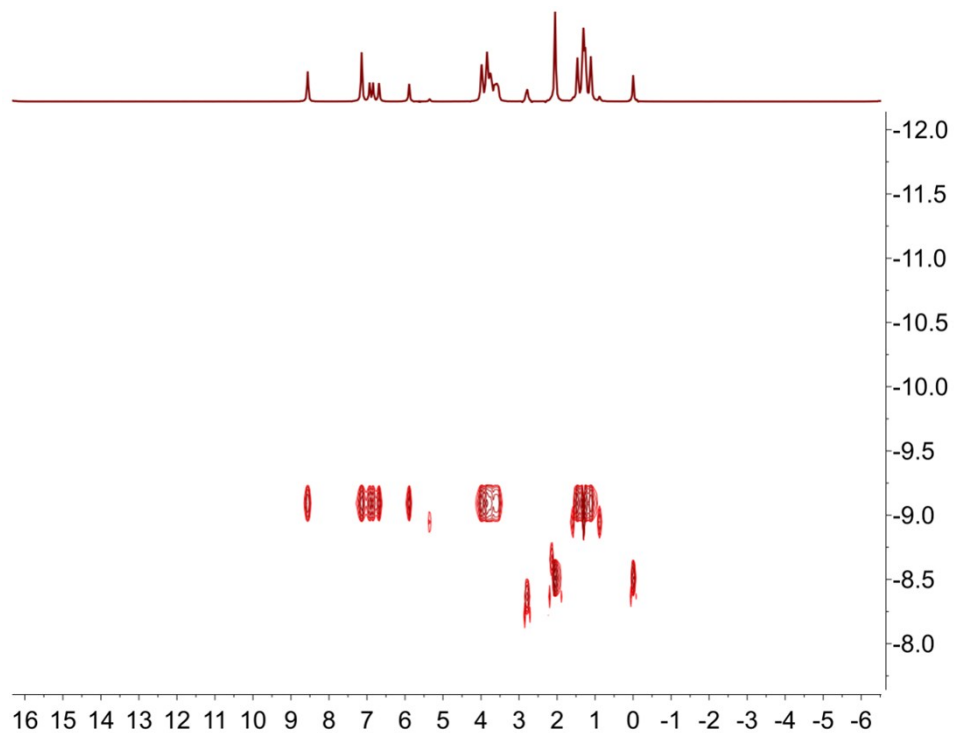

**Figure S12.** Partial DOSY NMR spectrum (500 MHz, acetone-*d*<sub>6</sub>, 298 K) of **1** at 5.00 mM.

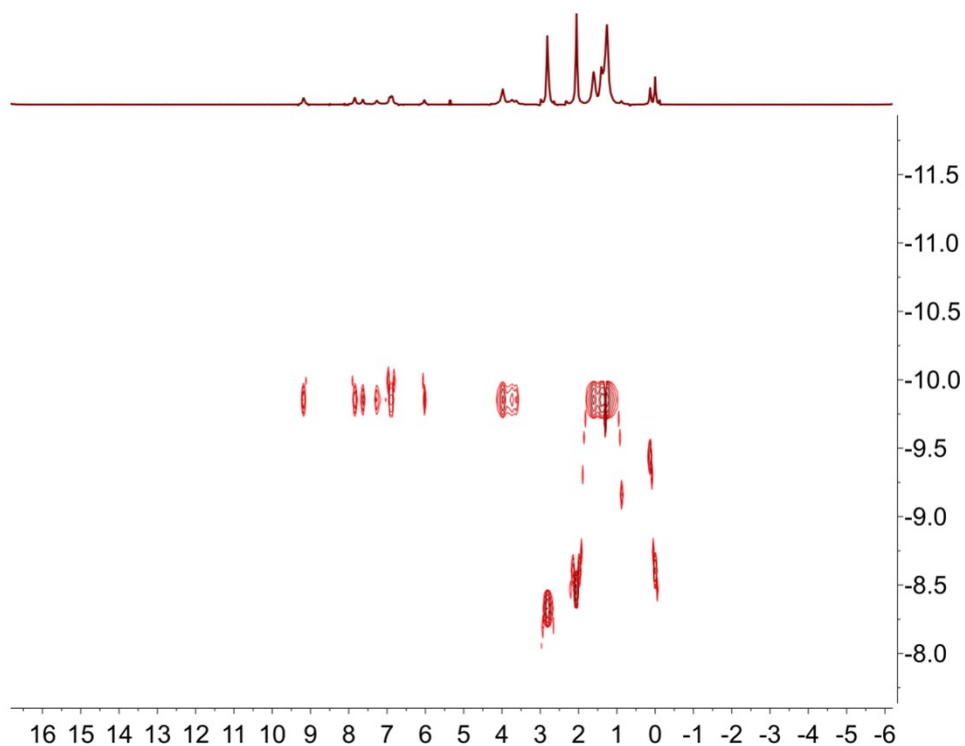

**Figure S13.** Partial DOSY NMR spectrum (500 MHz, acetone-*d*<sub>6</sub>, 298 K) of **1** + **3** at 5.00 mM.

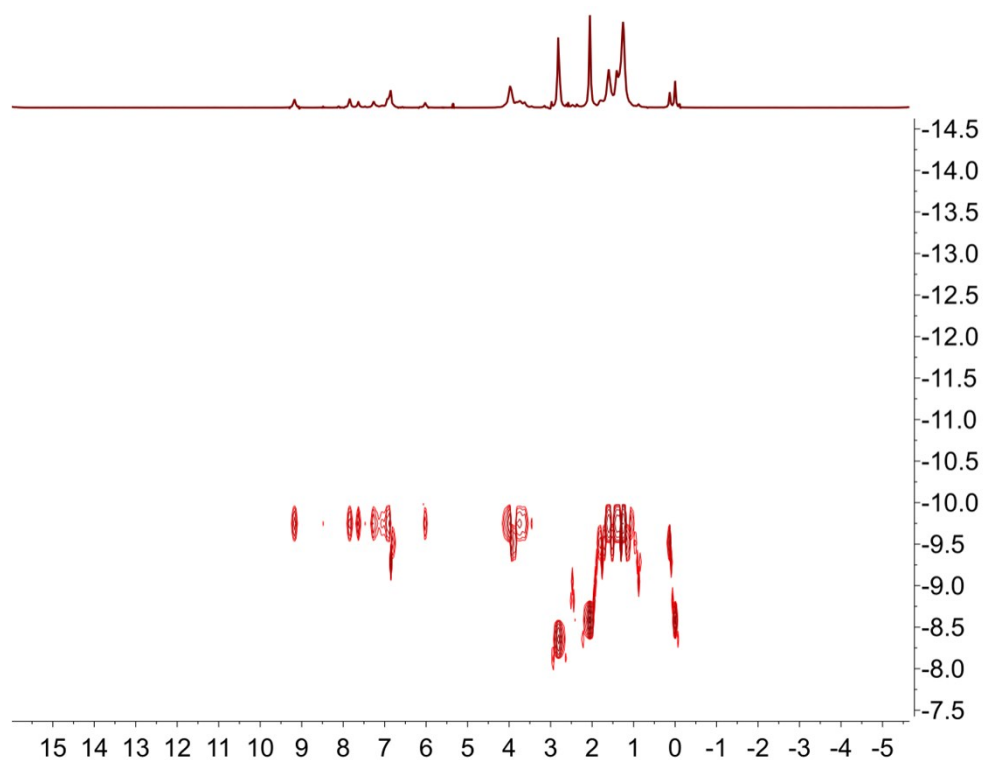

**Figure S14.** Partial DOSY NMR spectrum (500 MHz, acetone- $d_6$ , 298 K) of **1** + **3** + **2** at 5.00 mM.

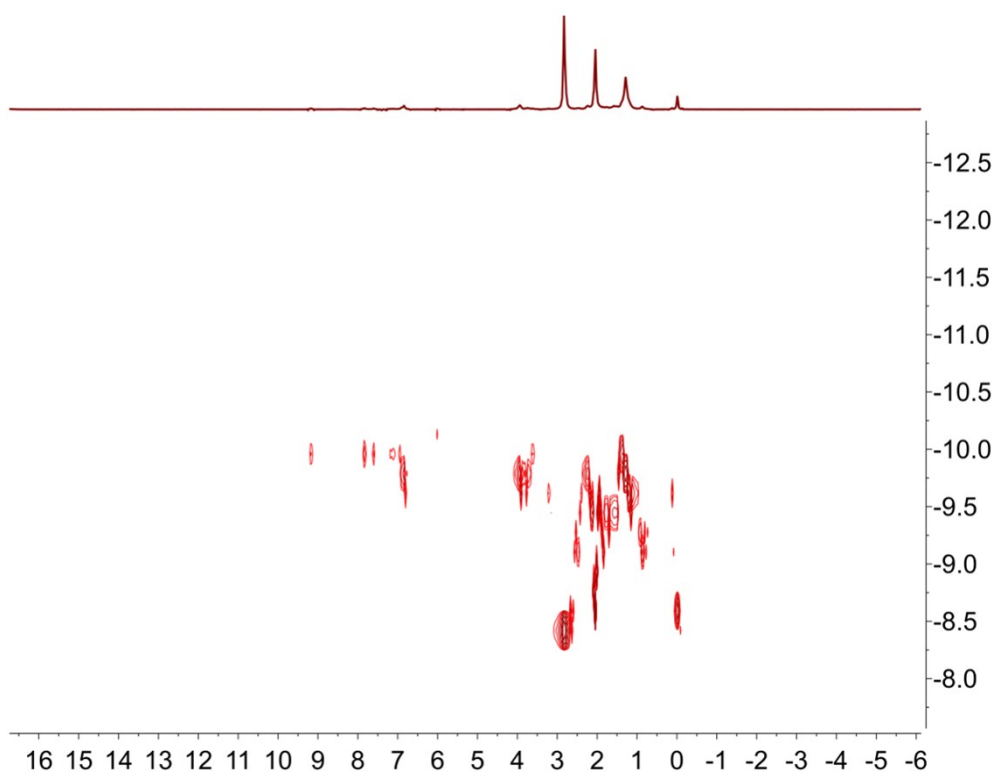

**Figure S15.** Partial DOSY NMR spectrum (500 MHz, acetone- $d_6$ , 298 K) of **1** + **4** at 5.00 mM.

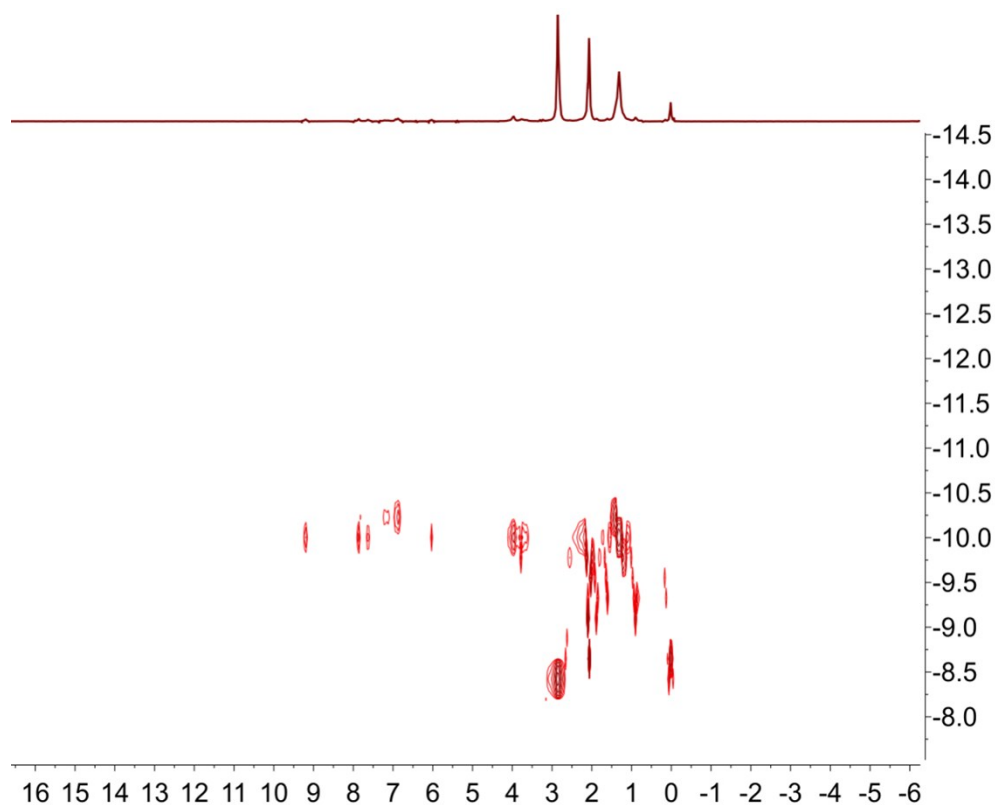

**Figure S16.** Partial DOSY NMR spectrum (500 MHz, acetone- $d_6$ , 298 K) of **1** + **4** + **2** at 5.00 mM.

#### 7. DOSY and DLS results of **1**, **1** + **4**, and **1** + **4** + **2**

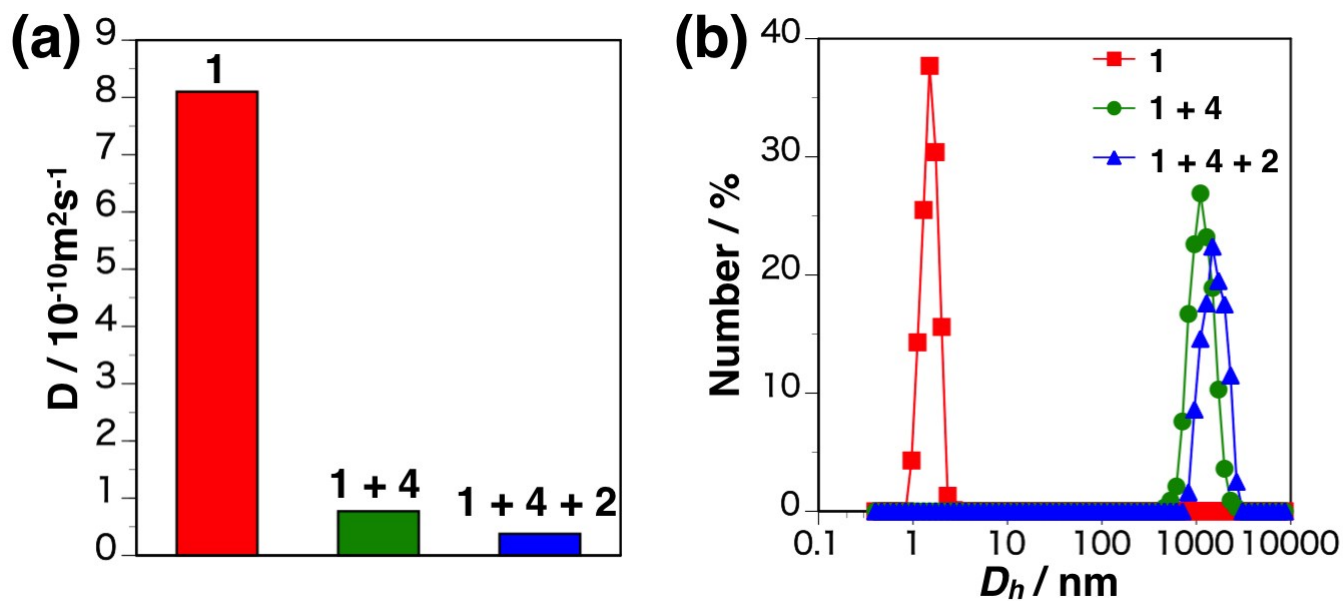

**Figure S17.** (a) Diffusion coefficient  $D$  values (500 MHz, acetone- $d_6$ , 298 K) of **1**, **1** + **4**, and **1** + **4** + **2**. (b) Size distributions of **1**, **1** + **4**, and **1** + **4** + **2**.  $c = 5.00$  mM.

8. SEM images of **1** + **4** and **1** + **4** + **2**

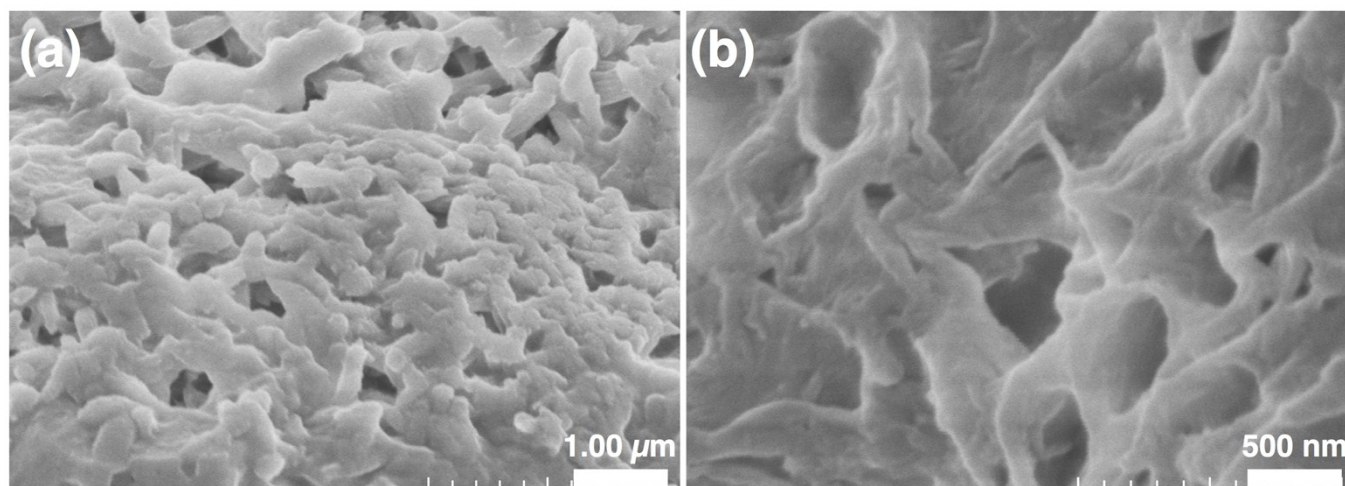

**Figure S18.** SEM image of (a) **1** + **4** and (b) **1** + **4** + **2** in acetone at 100 mM.

9. Multi-responsiveness of gels

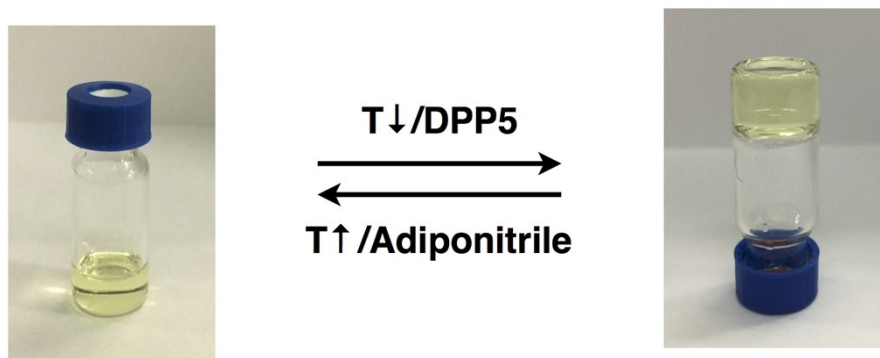

**Figure S19.** The gel-sol transitions of the supramolecular gel triggered by different stimuli.

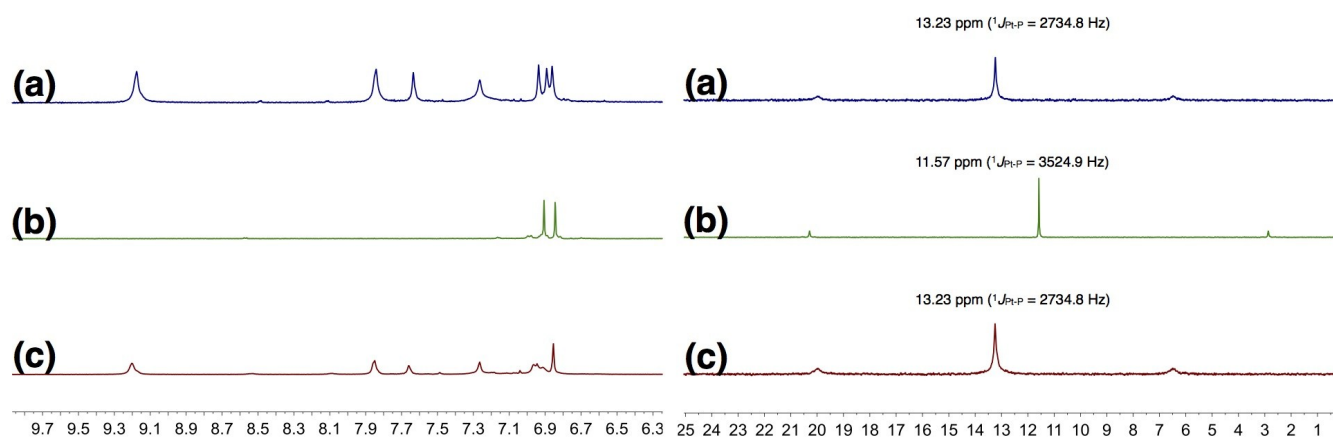

**Figure S20.** Partial  $^1\text{H}$  NMR (500 MHz, acetone- $d_6$ , 298 K) (left) and  $^{31}\text{P}\{^1\text{H}\}$  NMR (202.3 MHz, acetone- $d_6$ , 298 K) (right) spectra of (a) **1** + **3** + **2**; (b) after the addition of 2 equiv of TBABr to a; (c) after subsequent addition of 4 equiv of AgOTf to b.  $c = 5.00$  mM.

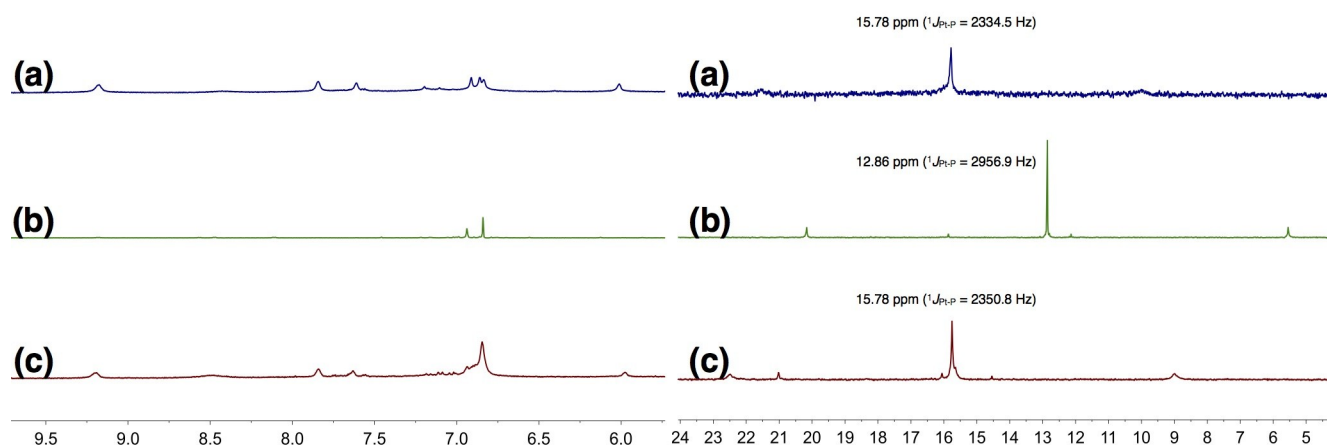

**Figure S21.** Partial  $^1\text{H}$  NMR (500 MHz, acetone- $d_6$ , 298 K) (left) and  $^{31}\text{P}\{^1\text{H}\}$  NMR (202.3 MHz, acetone- $d_6$ , 298 K) (right) spectra of (a) **1** + **4** + **2**; (b) after the addition of 2 equiv of TBABr to a; (c) after subsequent addition of 4 equiv of AgOTf to b.  $c = 5.00$  mM.

#### 10. X-ray analysis data for **1**

Crystallographic data: prism, colourless,  $0.448 \times 0.350 \times 0.252$  mm<sup>3</sup>,  $\text{C}_{61}\text{H}_{68}\text{N}_2\text{O}_8 \cdot 2\text{C}_3\text{H}_6\text{O}$ ,  $FW$  1073.33, orthorhombic, space group  $P-1$ ,  $a = 25.3293(7)$ ,  $b = 20.1695(5)$ ,  $c = 23.6895(6)$  Å,  $\alpha = 90^\circ$ ,  $\beta = 90^\circ$ ,  $\gamma = 90^\circ$ ,  $V = 12102.5(5)$  Å<sup>3</sup>,  $Z = 8$ ,  $D_c = 1.178$  g cm<sup>-3</sup>,  $T = 150(1)$  K,  $\mu = 0.078$  mm<sup>-1</sup>, 28854 measured reflections, 9828 independent reflections, 1359 parameters, 59 restraints,  $F(000) = 4608$ ,  $R_1 = 0.1727$ ,  $wR_1 = 0.3001$  (all data),  $R_2 = 0.0889$ ,  $wR_2 = 0.2365$  [ $I > 2\sigma(I)$ ], max. residual density 0.792 e $\cdot$ Å<sup>-3</sup>, and goodness-of-fit ( $F^2$ ) = 1.015. CCDC 1522035.

*11. References:*

- S1. Z. Li, Y. Zhang, C. Zhang, L. Chen, C. Wang, H. Tan, Y. Yu, X. Li and H.-B. Yang, *J. Am. Chem. Soc.*, 2014, **136**, 8577.
- S2. P. Wei, J. Li, X. Yan and Q. Zhou, *Org. Lett.*, 2014, **16**, 126.
- S3. P. Wei, S. Li, Y. Zhang, Y. Yu and X. Yan, *Polym. Chem.*, 2014, **5**, 3972.
- S4. T. Ogoshi, D. Yamafuji, D. Kotera, T. Aoki, S. Fujinami and T. Yamagishi, *J. Org. Chem.*, 2012, **77**, 11146.
